# Supplementary material
Source: PubMed Central journal article supplement (PMC4513646)

## Supporting Information

Petrova and Resh

### Hedgehog Acyltransferase is a target for inhibiting pancreatic cancer cell growth

#### Supplementary Table 1

#### Supplementary Figures

**Supplementary Figure 1.** Hhat knockdown inhibits Shh signaling in Panc-1 and Panc 05.04 cells. (a, b) Hhat was depleted in Panc-1 cells using lentivirally delivered shRNAs, and the cells were selected in puromycin. Hhat (a) and Gli-1 (b) mRNA levels were determined by qPCR. Bars represent mean  $\pm$  SD (n=2). The experiment was performed three times. (c,d) Panc 05.04 cells were treated as described in A. Hhat (c) and Gli-1 (d) mRNA levels were determined by qPCR. Bars represent mean  $\pm$  SD (n=2).

**Supplementary Figure 2.** Quantification of Shh knockdown in Panc-1 experiments from Figure 1i. mRNA levels of Shh were measured in the cells used in the experiment from Figure 1i. The corresponding Hhat levels, following Hhat knockdown are shown in Supplementary Figure 1A. Bars represent mean  $\pm$  SD (n=2).

**Supplementary Figure 3.** Hhat knockdown decreases proliferation of Panc-1 and Panc 05.04 cells. (a) Panc-1 cells stably expressing scrambled or Hhat shRNA were plated at  $4 \times 10^4$  cells/well in a 6-well plate. Cells were grown for 6 days and counted. Bars are mean  $\pm$  SD (n=2). The

experiment was performed three times. **(b)** Panc 05.04 cells were stably transfected as described in A.  $1 \times 10^5$  cells were plated/ well in a 6-well plate, grown for 4 days, then counted. Bars are mean  $\pm$  SD (n=2). The experiment was performed three times.

**Supplementary Figure 4.** RU-SKI 43 treatment does not affect proliferation of Hs766t pancreatic cancer cells. Hs766t cells were seeded at  $5 \times 10^4$  cells/well in 6-well plates. 24h later, DMSO, 10 $\mu$ M RU-SKI 43 or 10 $\mu$ M LDE-225 was added to the media. Cells were grown in the presence of drugs until they were counted on Day 4 or Day 7. Each point is the mean  $\pm$  SD (n=2).

**Supplementary Figure 5.** Gene knockdown in Panc-1 cells used for the pancreatic cancer xenograft experiments in mice. Panc-1 cells were transfected with shRNAs (scrambled, Shh or Hhat) and selected in puromycin. mRNA levels of Shh and Hhat were measured by qPCR. Each bar represents mean  $\pm$  SD (n=2).

**Supplementary Table 1. List of targets tested with the PathScan<sup>®</sup> Intracellular Signaling Array Kit.** + indicates presence of the modification, - indicates absence.

| <b>TARGET</b>        | <b>MODIFICATION</b>           | <b>DMSO</b> | <b>RU-SKI 43</b> |
|----------------------|-------------------------------|-------------|------------------|
| ERK1/2               | Thr202/Tyr204 Phosphorylation | -           | -                |
| Stat1                | Tyr701 Phosphorylation        | -           | -                |
| Stat3                | Tyr705 Phosphorylation        | -           | -                |
| Akt                  | Thr308 Phosphorylation        | +           | -                |
| Akt                  | Ser473 Phosphorylation        | +           | -                |
| AMPK $\alpha$        | Thr172 Phosphorylation        | +           | +                |
| S6 Ribosomal Protein | Ser235/236 Phosphorylation    | +           | -                |
| mTOR                 | Ser2448 Phosphorylation       | +           | -                |
| HSP27                | Ser78 Phosphorylation         | -           | -                |
| Bad                  | Ser112 Phosphorylation        | +           | -                |
| P70 S6 Kinase        | Thr389 Phosphorylation        | -           | -                |
| PRAS40               | Thr246 Phosphorylation        | +           | -                |
| p53                  | Ser15 Phosphorylation         | +           | -                |
| p38                  | Thr180/Tyr182 Phosphorylation | +           | +                |
| SAPK/JNK             | Thr183/Tyr185 Phosphorylation | -           | -                |
| PARP                 | Asp214 Cleavage               | -           | -                |
| Caspase-3            | Asp175 Cleavage               | -           | -                |
| GSK-3 $\beta$        | Ser9 Phosphorylation          | +           | -                |

Figure S1

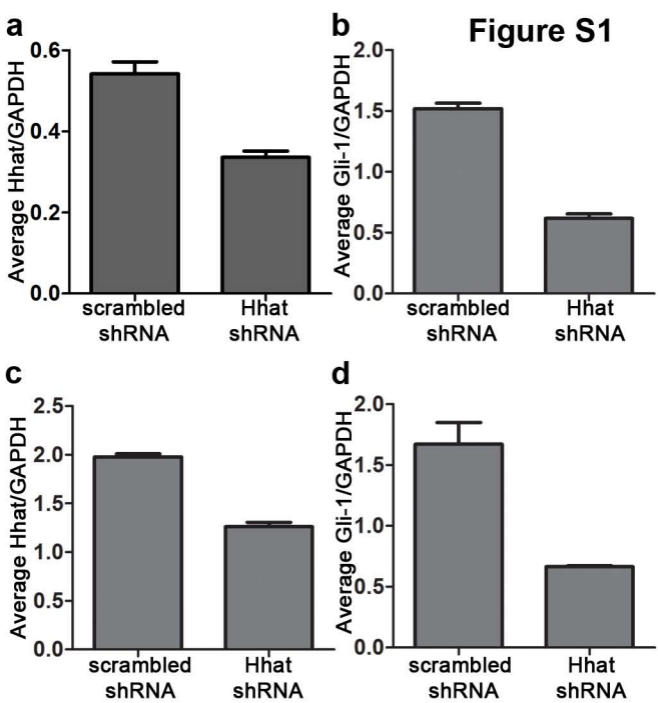

Figure S2

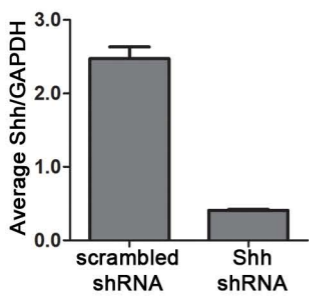

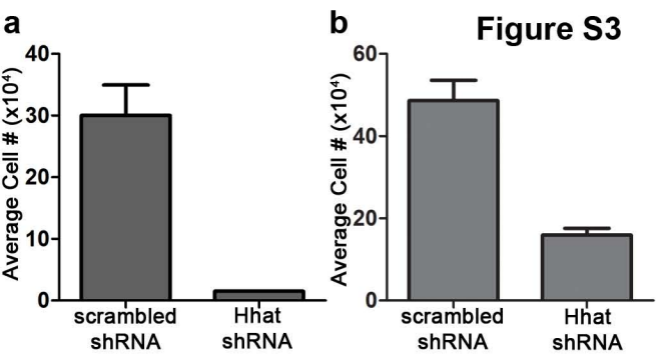

**Figure S4**

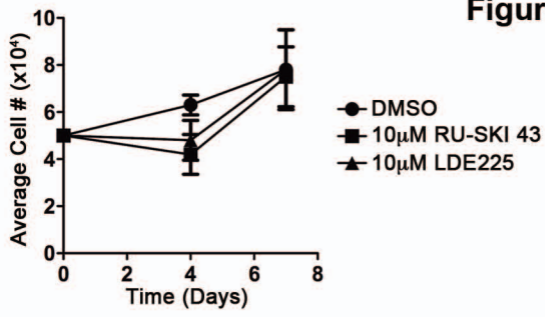

Figure S5

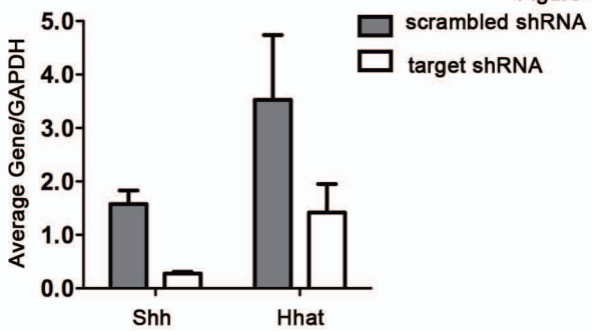

Supplement: NIHMS707892-supplement-Supplemental_Info.pdf [file NIHMS707892-supplement-Supplemental_Info.pdf]
